# Supplementary material for: Molecular Docking Guided Grid-Independent Descriptor Analysis to Probe the Impact of Water Molecules on Conformational Changes of hERG Inhibitors in Drug Trapping Phenomenon
Source: MDPI journal article supplement (doi:10.3390/ijms20143385), 2019-07-10
Supplement: s1 [file s1]

# Supplementary Information

## Probing the impact of water molecules on conformational changes of hERG inhibitors in drug trapping phenomenon

Saba Munawar<sup>1</sup>, Jamie I. Vandenberg<sup>2</sup> and Ishrat Jabeen<sup>1\*</sup>

<sup>1</sup> Research Center for Modeling and Simulation (RCMS), National University of Science and Technology, Sector H-12, 44000, Islamabad Pakistan

<sup>2</sup> Victor Chang Cardiac Research Institute, Lowy Packer Building, 405 Liverpool Street Darlinghurst Sydney NSW 2010, Australia

\* Correspondence: **Dr. Ishrat Jabeen** Associate Professor. \*E-mail: [ishrat.jabeen@rcms.nust.edu.pk](mailto:ishrat.jabeen@rcms.nust.edu.pk) Phone: +92-51-90855732. Research Center for Modeling and Simulation (RCMS). National University of Sciences and Technology (NUST). Sector H-12, Islamabad, Pakistan

### Table of Content

| Table     | Title                                                             |
|-----------|-------------------------------------------------------------------|
| Figure S1 | The plot of energy minimization, time steps versus energy values. |
| Figure S2 | RMSD values of hERG cryo-EM open conformational structure.        |
| Table S1  | GRIND models validation values of internal testset.               |
| Table S2  | GRIND models validation values of external testset.               |

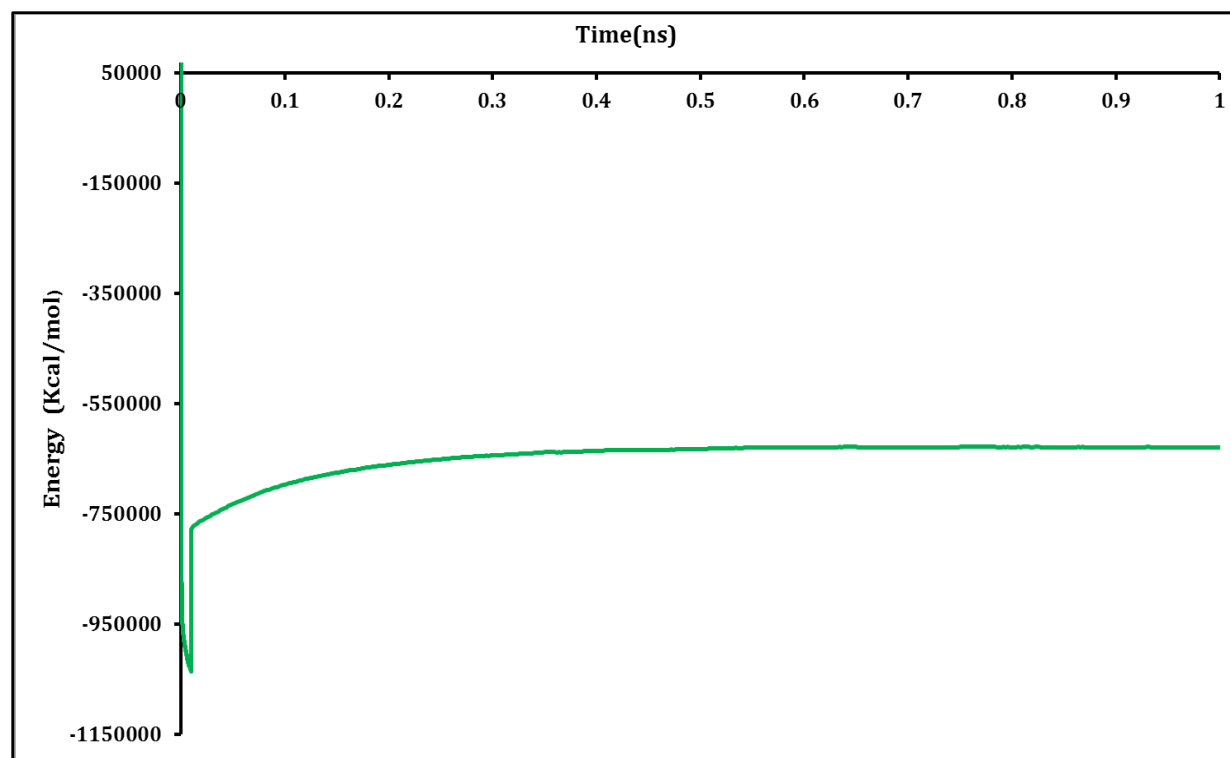

Figure S1: Plot showing energy minimization time steps versus energy values.

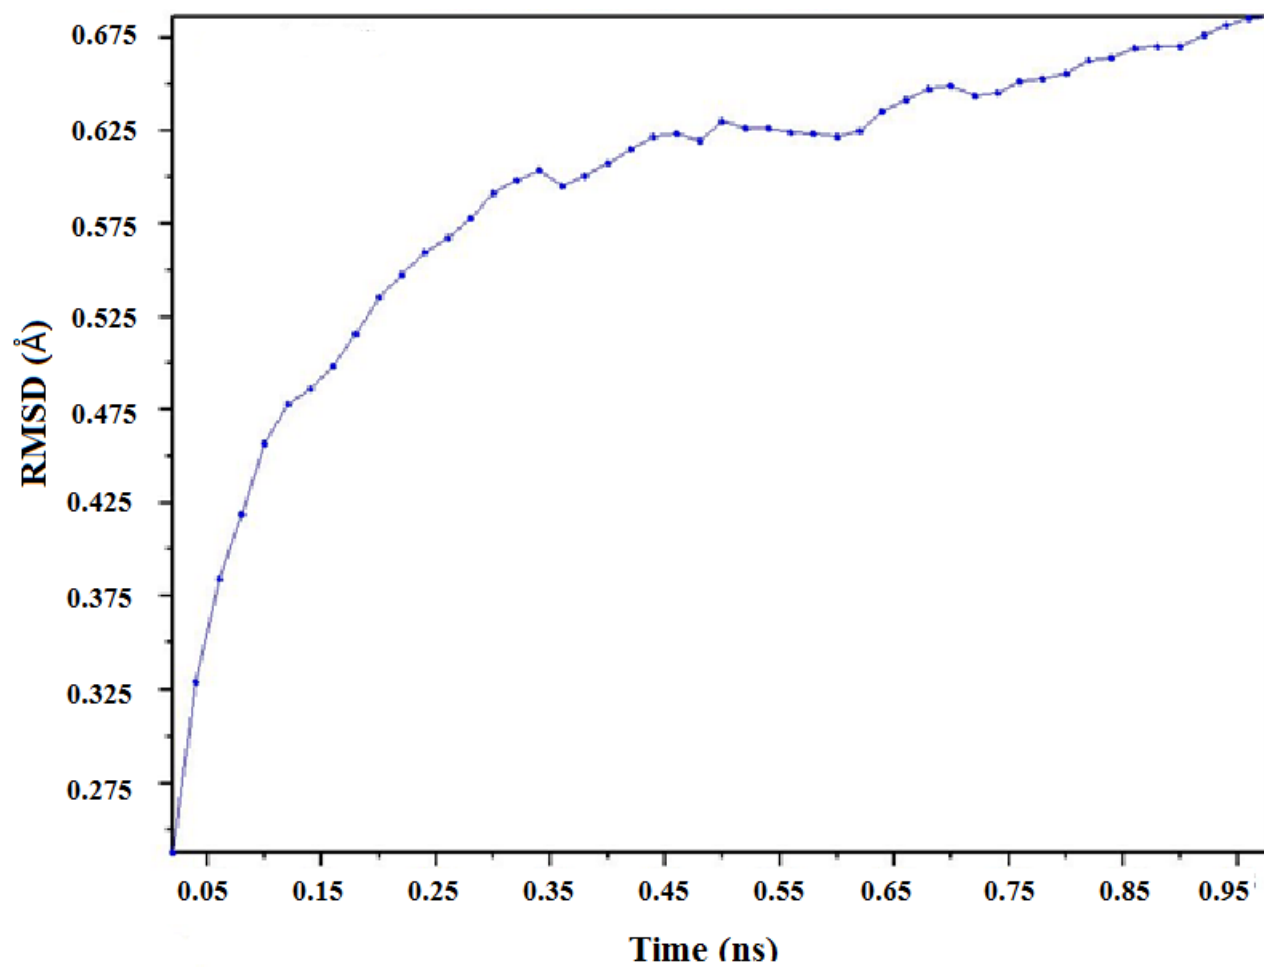

Figure S2: Plot showing RMSD values of hERG cryo-EM open conformational structure from starting frame to last frame

**Table S1:** Showing actual and predicted values of internal test set compounds obtained from open and closed solvated and non-solvated conformations.

| Compounds                 | Actual pIC <sub>50</sub> | Solvated-Open | Non-Solvated-Open | Non-Solvated-Closed | Solvated-Closed |
|---------------------------|--------------------------|---------------|-------------------|---------------------|-----------------|
| Desloratin                | 5.35                     | 6.15          | 6.14              | 5.86                | 6.22            |
| Carbamazepine             | 3.60                     | 5.49          | 5.17              | 5.12                | 5.45            |
| Phenytoin                 | 3.62                     | 4.33          | 3.34              | 4.53                | 4.77            |
| Ropinirole                | 5.92                     | 5.59          | 6.04              | 5.37                | 4.97            |
| Cibenzoline               | 5.43                     | 5.48          | 5.17              | 5.39                | 5.64            |
| Protriptyline             | 5.93                     | 6.12          | 6.17              | 5.18                | 5.55            |
| Pilsicainide              | 4.69                     | 5.52          | 4.97              | 5.39                | 5.52            |
| BMCL_03_13_1829-1835_22   | 5.46                     | 5.79          | 5.92              | 5.78                | 6.32            |
| Doxepin                   | 5.19                     | 5.80          | 5.48              | 5.29                | 6.19            |
| Imipramine                | 5.47                     | 6.29          | 6.33              | 5.50                | 5.92            |
| BMCL_03_13_1829-1835_16   | 4.59                     | 6.02          | 6.05              | 5.84                | 6.45            |
| Ondasetron                | 6.09                     | 5.44          | 5.42              | 5.91                | 6.01            |
| N-desmethyl-olanzapine    | 4.85                     | 5.31          | 5.65              | 5.13                | 4.38            |
| Metoclopramide            | 5.27                     | 5.63          | 4.53              | 5.30                | 5.65            |
| BMCL_03_13_1829-1835_21_1 | 5.66                     | 6.06          | 5.92              | 5.54                | 5.61            |
| Methadone(R)              | 5.15                     | 5.63          | 5.28              | 5.10                | 5.56            |
| Granisetron               | 5.43                     | 4.46          | 5.65              | 5.02                | 5.21            |
| N-desmethyl-clozapine     | 5.35                     | 6.00          | 5.94              | 5.48                | 5.62            |
| BMCL_03_13_1829-1835_17   | 5.83                     | 6.08          | 6.11              | 5.90                | 6.41            |
| Chlorpromazine            | 5.81                     | 5.98          | 6.21              | 5.54                | 6.01            |
| Cyamemazine               | 6.33                     | 6.77          | 6.84              | 6.17                | 6.15            |
| Citalopram                | 5.40                     | 6.89          | 6.92              | 6.31                | 5.69            |
| Norfluoxetine             | 5.60                     | 6.18          | 5.76              | 5.62                | 5.83            |
| Ajmaline                  | 5.98                     | 5.12          | 5.08              | 4.84                | 4.68            |
| Clozapine                 | 5.60                     | 5.81          | 5.10              | 5.76                | 5.55            |

|                            |      |             |             |             |             |
|----------------------------|------|-------------|-------------|-------------|-------------|
| 2-Hydroxymethyl-olanzapine | 4.94 | 5.06        | 5.45        | 5.02        | 4.95        |
| Ambasilide                 | 5.44 | 6.33        | 6.02        | 6.05        | 6.09        |
| Fentanyl                   | 5.74 | 6.82        | 6.69        | 6.60        | 6.93        |
| Trazodone                  | 5.54 | 6.40        | 5.91        | 6.58        | 6.70        |
| Clebopride                 | 6.21 | 7.29        | 6.73        | 7.08        | 6.02        |
| CJ-033466                  | 5.59 | 7.05        | 7.11        | 5.96        | 5.11        |
| clomiphen                  | 6.74 | 7.52        | 7.05        | 7.05        | 6.77        |
| BMCL_03_13_1829-1835_3     | 8.00 | 7.99        | 7.51        | 7.71        | 8.48        |
| Trifluoperazine            | 5.85 | 6.32        | 5.97        | 5.68        | 6.16        |
| JMC20081730_1              | 6.02 | 6.40        | 6.35        | 6.35        | 5.91        |
| Risperidone                | 6.82 | 5.88        | 6.09        | 6.06        | 6.17        |
| JMC20081730_23             | 5.73 | 7.10        | 7.44        | 6.41        | 6.14        |
| Sertindole                 | 8.00 | 8.12        | 8.13        | 7.85        | 7.83        |
| Dofetilide                 | 8.00 | 7.20        | 7.81        | 5.21        | 5.14        |
| Gbr-12909/ vanoxerine      | 9.00 | 7.54        | 7.66        | 7.78        | 7.65        |
| R <sup>2</sup>             |      | <b>0.58</b> | <b>0.52</b> | <b>0.48</b> | <b>0.36</b> |

**Table S2:** Showing actual and predicted values of internal test set compounds obtained from open and closed solvated and non-solvated conformations

| Sr. No | Compound ID   | Smiles                                             | Expimental pIC <sub>50</sub> | hERG cryo_EM model in open state |          | hERG homology model in the closed state |          | Ref          |
|--------|---------------|----------------------------------------------------|------------------------------|----------------------------------|----------|-----------------------------------------|----------|--------------|
|        |               |                                                    |                              | Non-Solvated                     | Solvated | Non-Solvated                            | Solvated |              |
| 1      | CHEMBL3885379 | FC(F)(F)c1c(OC[C@H]2C[C@@H]2c3ccc(Cl)cc3)ccn4c(CC5 | 6.42                         | 7.09                             | 7.51     | 6.37                                    | 6.33     | <sup>1</sup> |

|    |               |                                                                   |      |      |      |      |      |   |
|----|---------------|-------------------------------------------------------------------|------|------|------|------|------|---|
|    |               | CC5)nnc14                                                         |      |      |      |      |      |   |
| 2  | CHEMBL3897030 | Br1ccc2c(NC3=NC[C@@]4(CN5CC4CC5)O3)ncnn12                         | 5.60 | 5.91 | 5.83 | 5.98 | 5.32 | 2 |
| 3  | CHEMBL3899686 | COc1ccc(OC)c(Cc2nc3ccccc3n2CC(=O)Nc4cc(cc(c4)C(C)(C)C)C(C)(C)C)c1 | 7.70 | 6.80 | 7.89 | 7.62 | 6.88 | 3 |
| 4  | CHEMBL3904792 | Cl.NC(=N)N\N=C\c1ccc(cc1)c2ccc(\C=N\Nc3ccc(F)cc3)cc2              | 5.48 | 6.52 | 6.59 | 6.99 | 6.58 | 4 |
| 5  | CHEMBL3913789 | Cl.NC(=N)N\N=C\c1ccc(cc1)c2ccc(\C=N\Nc3ccccc3Cl)cc2               | 5.94 | 7.26 | 6.94 | 6.42 | 6.54 | 4 |
| 6  | CHEMBL3922790 | CCN1CCCC1CNC(=O)c2ccc(Cn3c(Cc4c(Cl)cccc4Cl)nc5cccc35)cc2          | 5.80 | 5.43 | 7.74 | 6.15 | 7.00 | 3 |
| 7  | CHEMBL3923854 | Cl.NC(=N)N\N=C\c1ccc(cc1)c2ccc(\C=N\Nc3ccc(F)cc3F)c2              | 5.65 | 6.30 | 6.93 | 5.75 | 5.91 | 4 |
| 8  | CHEMBL3941777 | Cl.NC(=N)N\N=C\c1ccc(cc1)c2ccc(\C=N\Nc3ccccc3Br)cc2               | 6.36 | 7.02 | 8.04 | 7.25 | 7.18 | 4 |
| 9  | CHEMBL3944559 | Cl.Cl.C\C(=N/NC(=N)N)\c1ccc2c(Cc3cc(ccc23)\C(=N\NC(=N)N)\C)c1     | 5.95 | 6.36 | 7.10 | 7.41 | 6.91 | 4 |
| 10 | CHEMBL3947919 | CN(C)CCCN(C(=O)c1ccc(Cn2c(Cc3c(Cl)cccc3Cl)nc4cccc24)cc1           | 5.34 | 6.32 | 7.26 | 7.55 | 6.71 | 3 |

|    |               |                                                                                               |      |      |      |      |      |   |
|----|---------------|-----------------------------------------------------------------------------------------------|------|------|------|------|------|---|
| 11 | CHEMBL5931690 | <chem>S1C=C([NH+])(c2ccccc2)[C-]1\C=C(\Nc1ccc(OC)cc1)/C)c1ccccc1</chem>                       | 7.14 | 8.14 | 8.13 | 7.96 | 7.43 | 5 |
| 12 | Compound 3    | <chem>C1=CC=C(C(=C1)C2=NC3=CN(C=CC3=N2)CC4=NN=C(C=C4)C5=C(C=C(C=C5)C(F)(F)F)C(F)(F)F)F</chem> | 5.20 | 6.15 | 7.29 | 6.89 | 6.10 | 6 |
| 13 | mol1          | <chem>Fc1cc(ccc1F)CCOC=1n2c(nnc2-c2ccc(nc2)C(F)(F)F)C=NC=1</chem>                             | 4.48 | 5.91 | 5.52 | 5.11 | 5.66 | 7 |
| 14 | mol2          | <chem>FC(F)Oc1ccc(cc1)-c1n2c(nn1)C=NC=C2CN1Cc2c(C1)cccc2</chem>                               | 4.53 | 4.23 | 5.14 | 5.73 | 5.49 | 7 |
| 15 | OSM-S-175     | <chem>FC(F)(F)c1nccc(NC(=O)C=2n3c(nnc3-c3ccc(OC(F)F)cc3)C=NC=2)c1</chem>                      | 5.60 | 5.04 | 5.64 | 5.89 | 4.82 | 7 |
| 16 | OSM-S-189     | <chem>Clc1ccccc1CCOC=1n2c(nnc2-c2ccc(cc2)C#N)C=NC=1</chem>                                    | 4.48 | 6.03 | 6.38 | 6.11 | 5.02 | 7 |
| 17 | OSM-S-201     | <chem>Clc1cccc(NC(=O)C=2n3c(nnc3-c3ccc(OC(F)F)cc3)C=NC=2)c1C</chem>                           | 5.12 | 5.84 | 5.80 | 5.26 | 5.27 | 7 |
| 18 | OSM-S-202     | <chem>Clc1cc(NC(=O)C=2n3c(nnc3-c3ccc(OC(F)F)cc3)C=NC=2)cc1</chem>                             | 4.89 | 5.68 | 5.75 | 5.41 | 5.38 | 7 |
| 19 | OSM-S-206     | <chem>FC(F)(F)c1cc(cc(NC(=O)C=2n3c(nnc3-</chem>                                               | 5.24 | 5.57 | 5.73 | 5.49 | 4.52 | 7 |

|    |           |                                                                       |      |      |      |      |      |   |
|----|-----------|-----------------------------------------------------------------------|------|------|------|------|------|---|
|    |           | c3ccc(OC(F)F)cc3)C=NC=2)c1)<br>C(F)(F)F                               |      |      |      |      |      |   |
| 20 | OSM-S-218 | Fc1cc(ccc1F)[C@@H](OC)CO<br>C=1n2c(nnc2-<br>c2ccc(cc2)C#N)C=NC=1      | 5.20 | 5.40 | 6.00 | 5.73 | 6.36 | 7 |
| 21 | OSM-S-31  | O(C(=O)c1cc(n(c1C)-<br>c1cccc1)C)CC                                   | 5.41 | 5.69 | 5.40 | 5.49 | 4.89 | 5 |
| 22 | OSM-S-35  | S\1\C(=C/c2cc(n(c2C)-<br>c2cccc2)C)\C(=O)N/C/1=N/c<br>1cccc1          | 4.50 | 4.43 | 7.43 | 5.48 | 5.65 | 7 |
| 23 | OSM-S-353 | FC(F)OC(C=C1)=CC=C1C2=N<br>N=C3C=NC=C(OCC(C4=CC=<br>CC=C4)CO)N32      | 5.12 | 5.63 | 6.11 | 5.92 | 5.89 | 7 |
| 24 | OSM-S-369 | FC(F)OC(C=C1)=CC=C1C2=N<br>N=C3C=NC=C(OCCC4=CC=<br>CC=C4)N32          | 5.43 | 5.91 | 5.69 | 5.40 | 4.76 | 7 |
| 25 | OSM-S-371 | FC(F)OC(C=C1)=CC=C1C2=N<br>N=C3C=NC=C(OCCC4(C56)<br>C7C6C8C5C4C87)N32 | 5.64 | 5.98 | 5.95 | 5.71 | 5.68 | 7 |
| 26 | OSM-S-418 | FC(OC1=CC=C(C2=NN=C3C<br>=NC=C(N32)OCC[C]4[CH]BB<br>BBBBBBBB4)C=C1)F  | 5.92 | 6.11 | 7.92 | 6.39 | 7.42 | 7 |
| 27 | OSM-S-5   | Fc1ccc(-<br>n2c(C)c(cc2C)C(OCC(=O)N)=<br>O)cc1                        | 4.50 | 5.01 | 5.51 | 5.89 | 4.80 | 7 |



|    |                |                                                                                              |      |      |      |      |      |   |
|----|----------------|----------------------------------------------------------------------------------------------|------|------|------|------|------|---|
| 28 | OSM-S-525      | <chem>FC1=CC(CCOC2=CN=CC3=NN=C(C4=CC=C5C(NC=C5)=C4)N32)=CC=C1F</chem>                        | 5.76 | 5.47 | 6.43 | 6.39 | 5.33 | 7 |
| 29 | OSM-S-536      | <chem>FC(F)OC(C=C1)=CC=C1C2=NN=C3C=NC=C(OC[C@H](N)CC4=CC=CC=C4)N32</chem>                    | 5.46 | 6.90 | 7.15 | 6.67 | 5.91 | 7 |
| 30 | Tegobuvir      | <chem>C1=CC=C(C(=C1)C2=NC3=CN(C=CC3=N2)CC4=NN=C(C=C4)C5=C(C=C(C=C5)C(F)(F)F)C(F)(F)F)</chem> | 6.10 | 6.86 | 6.66 | 6.32 | 6.14 | 6 |
|    | R <sup>2</sup> |                                                                                              |      | 0.51 | 0.42 | 0.46 | 0.38 |   |

## References:

- Higgins, M. A. *et al.* Triazolopyridine ethers as potent, orally active mGlu 2 positive allosteric modulators for treating schizophrenia. *Bioorganic & medicinal chemistry* **25**, 496-513 (2017).
- Hill, M. D. *et al.* Development of 4-Heteroaryl-amino-1'-azaspiro [oxazole-5, 3'-bicyclo [2.2. 2] octanes] as  $\alpha$ 7 Nicotinic Receptor Agonists. *ACS medicinal chemistry letters* **8**, 133-137 (2016).
- Kim, T. *et al.* Discovery of benzimidazole derivatives as modulators of mitochondrial function: A potential treatment for Alzheimer's disease. *European journal of medicinal chemistry* **125**, 1172-1192 (2017).
- Shrestha, S. K. *et al.* Bis (N-amidinohydrazones) and N-(amidino)-N'-aryl-bishydrazones: new classes of antibacterial/antifungal agents. *Bioorganic & medicinal chemistry* **25**, 58-66 (2017).
- Munawar, S. *et al.* Experimentally Validated Pharmacoinformatics Approach to Predict hERG Inhibition Potential of New Chemical Entities. *Frontiers in Pharmacology* **9**, 1035 (2018).
- Liu, M. *et al.* Design, synthesis, and structure-activity relationships of novel imidazo [4, 5-c] pyridine derivatives as potent non-nucleoside inhibitors of hepatitis C virus NS5B. *Bioorganic & medicinal chemistry* **26**, 2621-2631 (2018).
- Williamson, A. E. *et al.* Open source drug discovery: highly potent antimalarial compounds derived from the tres cantos arylpyrroles. *ACS central science* **2**, 687-701 (2016).
